# Supplementary material
Source: Springer Nature journal article supplement (https://www.springermedizin.de/resource/supplementary/13000_2012_535_MOESM3_ESM.pdf/9624932)

Control

Cancer

A

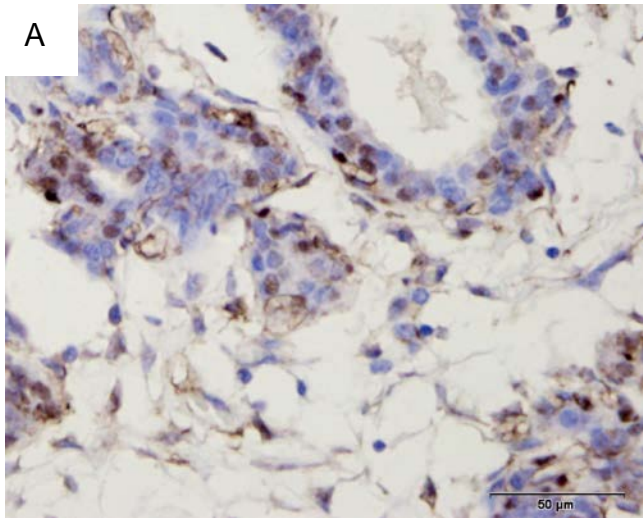

B

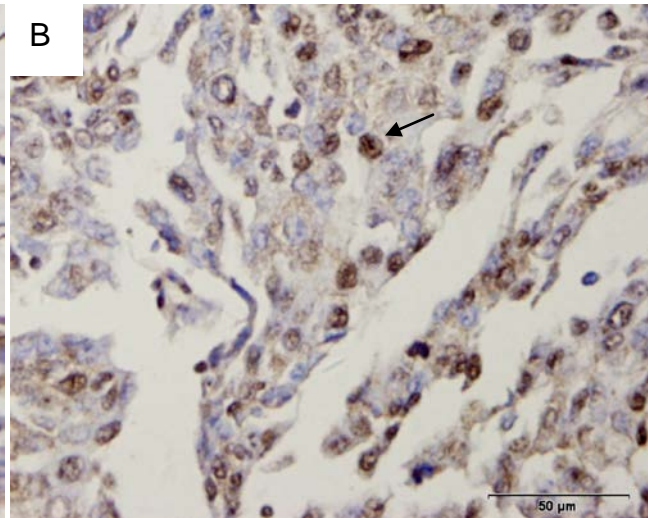

C

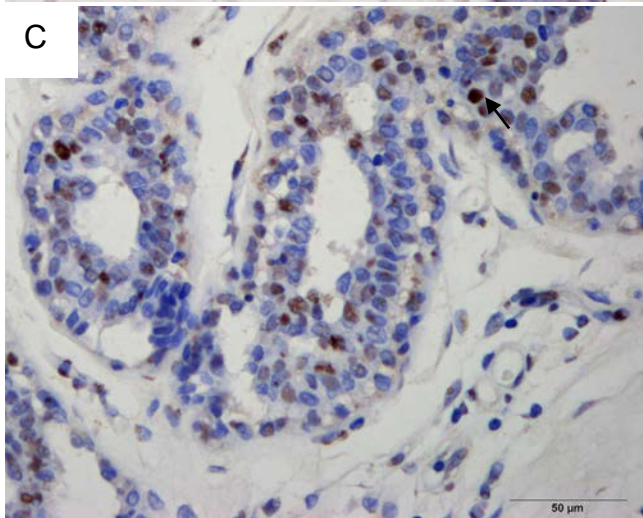

D

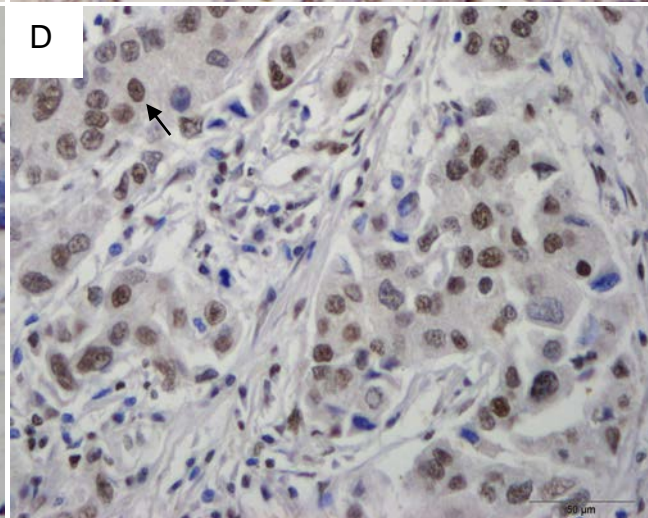

E

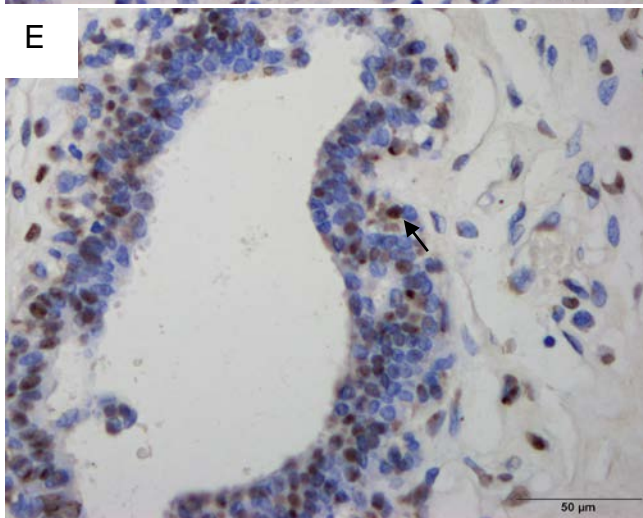

F

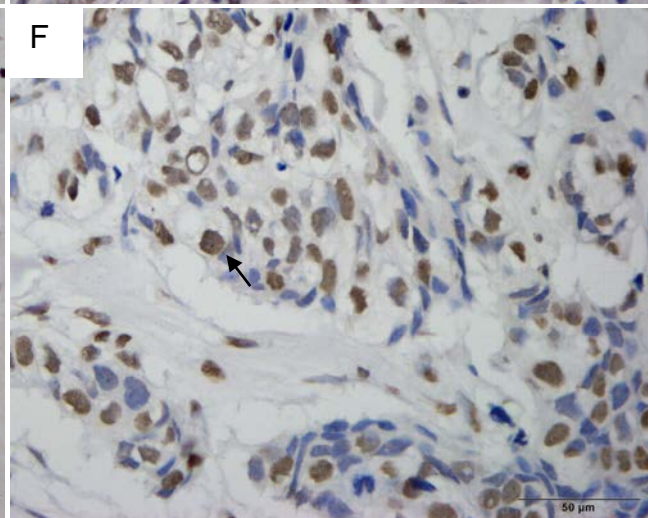

Supplement: MOESM3 [file 9624932]
